# Supplementary material
Source: Research Square preprint supplement (doi:10.21203/rs.3.rs-9528728/v1)
Supplement: Supplementary file 1 [file 1c5c9d49add5929e6303493c.docx]

# **Title:** Cost-Effectiveness Analysis of Deep Brain Stimulation for Parkinson's Disease in Türkiye

# **Supplementary Information**

# This supplementary document provides expanded methodological details, comprehensive clinical cohort criteria, and itemized cost parameters that strictly underpin the decision-analytic Markov model presented in the main manuscript

1. **Target Population and Comparators**

Data were collected from three public hospitals in Türkiye including one university hospital and two tertiary training and research hospitals.

The study population consisted of patients with PD who received treatment with the ICD-10 G20 diagnosis code between 01.01.2019 and 30.06.2023, as well as patients who received DBS treatment after undergoing Parkinson's treatment. It was determined that 31 of the patients continued drug treatment, and 9 of them received DBS treatment after drug treatment. All patients with follow-up were included in the study without age or gender discrimination. Since the study coincided with the COVID-19 pandemic period, the quality of life questionnaire to determine clinical effectiveness could not be applied. Therefore, clinical effectiveness data were obtained from the literature through a previously published systematic review [1].

Supplementary Table 1 shows the inclusion and exclusion criteria of the sample selected for the study. The sample was selected according to the PICOS model based on the components of population, interventions, comparators, outcomes, and study designs. Supplementary Figure 1 shows the Preferred Reporting Elements for Systematic Reviews and Meta-Analyses (PRISMA) Flowchart illustrating the Study Selection Process.

**Supplementary Table 1** Inclusion and Exclusion Criteria for Sample Selection

| **Criteria** | **Inclusion Criteria** | **Exclusion Criteria** |
| --- | --- | --- |
| **Participants**  **Intervention**  **Comparison Group**  **Outcome** | Parkinson's patients on medication and DBS patients with bilateral rechargeable neurostimulators | Parkinson’s disease patients under follow-up receiving medical therapy, and patients under follow-up treated with bilateral rechargeable Deep Brain Stimulation systems |
| **Intervention** | DBS+ MT | Physiotherapy and other device-assisted treatment methods |
| **Comparison Group** | MT | Physiotherapy and other device-assisted treatment methods |
| **Outcome** | Cost-effectiveness results (QALY, ICER, Cost) | No limitations |
| **Study Design** | Cost-effectiveness analysis (CEA) | Analyses outside of the CEA |

**Identification of studies via databases and registers**

Title and abstracts screened

(n =635)

Records excluded

(n =594)

**Identification**

Full-texts assessed for eligibility

(n =41)

Studies included in review

(n =12)

Reports of included studies

(n =12)

Records identified from*:

Databases (n =993)

PubMed (n =593)

Medline (n =126)

Scopus (n =274)

Records removed *before screening*:

Duplicate records removed (n =358)

Records marked as ineligible by automation tools (n =0)

Records removed for other reasons (n =0)

**Screening**

Reports sought for retrieval

(n =41)

Full-text not available

(n =0)

Reports excluded:

Without cost-effectiveness analysis (n =17)

A systematic review study

(n =4)

Intervention not relevant

(n =8)

**Included**

**Supplementary Figure 1** Preferred Reporting Items for Systematic reviews and Meta-Analyses (PRISMA) flow-chart showing the study selection process

1. **Cost Inputs**

In this study, the direct medical costs of PD were determined retrospectively using data obtained from the hospital's clinical, administrative, and financial records, national and international reports, and expert opinions. In addition, indicators such as utilization rates and prevalence were also used to calculate costs. In the study, after calculating the average treatment costs of the disease, total costs were obtained by multiplying by the prevalence of the disease. All costs were calculated according to the Health Implementation Communiqué, which is Türkiye's national report dated 05.02.2024. After the costs were determined in Turkish Liras, they were converted to Dollars according to the US Dollar exchange rate on 05.02.2024 (1 USD=30.4557 TL). Cost items for the MT option are examination, tests and examinations, and medication costs. The costs of DBS+MT consist of examination, tests and examinations, medication, medical device, battery adjustment, and battery replacement costs.

**MT Drug Costs**

Patient files and expert opinions were used to determine the cost of drugs used in MT and DBS. In addition, the Pharmaceutical Data Online Information Resource platform was used to calculate the public prices of drugs (https://www.ilacdata.com/).

The trade names of the drugs in the patients' files were determined and transferred to Excel. In the data forms transferred to Excel, the name, mg/mcg, form, number of tablets/capsules/injectors, and retail and public sales prices of the drugs were listed according to the active ingredient. With the data obtained, the average mg/mcg price for each drug was determined. The average dosage and duration of use of prescribed medicines for one year were determined from patient files and expert opinion. Total annual prescription costs per patient were calculated by multiplying the average mg/mcg price of the drugs by the dose and duration of use.

Other drugs prescribed due to side effects of the drugs (such as depression) and the patient's health condition (such as vitamin deficiency) were not included in the analysis, as they may have misleading effects on the research.

**DBS Costs**

In Türkiye, DBS surgery is provided as a package service in hospitals. In this respect, preoperative, intraoperative, and postoperative procedures are included in the package. However, the brain stimulator, brain electrode, DBS microelectrode, patient programmer, and extension cable used in the surgery are not part of the package and are provided by the patients.

Battery adjustment/programming is performed to increase the effectiveness of the drugs taken after the DBS procedure. In addition, patients undergo battery replacement after DBS surgery according to their disease status. Battery replacement is generally reported every 5 years in the literature [2]. In addition to all these costs, medication use continues after DBS surgery. In this respect, the DBS application is divided into different cost headings, such as surgery, programming, battery replacement, and medication costs.

**DBS Surgery Costs**

The package fee for bilateral Deep Brain Neurostimulator Implantation in the DBS service package is $4,845.26. The cost of programming after DBS surgery is $ 26.62. The cost of medication varies depending on the stage of the disease. Every 5 years, we calculated the cost of battery replacement, which consists of hospitalization, removal of the device, cost of a new device, and intensive care costs. The battery replacement cost was calculated as $6,342.10. Table 2 shows the costs of medical supplies that are charged out of package.

**Supplementary Table 2** Out-of-Package Procedures for DBS

| **Material** | **Cost (TRY)** | **Cost ($)** |
| --- | --- | --- |
| Subcutaneous Implantable Brain Stimulator, Dual Output, Non-Rechargeable | **181,104.0** | **5,946.47** |
| Brain Electrode (Lead) x 2 | **47,643.76** | **1,564.36** |
| DBS Microelectrode | **1,185.80** | **38.94** |
| Patient Programmer (External) | **5,659.50** | **185.82** |
| Extension Cable x2 | **12,705.00** | **417.16** |

**DBS Drug Costs**

Cost reduction was based on trends showing a gradual decrease in drug costs after DBS surgery. The model in the cost-effectiveness study published by Pietzsch [3] was used to derive a cost reduction factor. This model is based on the findings of several long-term studies [4-8]. Table 4 shows the drug utilization costs calculated over the years based on these studies.

**Supplementary Table 3** DBS Drug Cost

| **Stages** | **Cost Before DBS ($)** | **Cost of Medicine at the End of Year 1 ($)** | **Cost of Medicine at the End of Year 3 ($)** | **Cost of Medicine at the End of Year 5 ($)** | **Cost of Medicine in 6 and Subsequent Years ($)** |
| --- | --- | --- | --- | --- | --- |
| **H&Y 1** | 342.80 | 109.70 | 137.12 | 155.63 | 188.54 |
| **H&Y 2** | 932.97 | 298.55 | 373.19 | 423.57 | 513.14 |
| **H&Y 3** | 1,056.24 | 338.00 | 422.50 | 479.53 | 580.93 |
| **H&Y 4** | 1,490.56 | 476.98 | 596.22 | 676.71 | 819.81 |
| **H&Y 5** | 1,832.10 | 586.27 | 732.84 | 831.77 | 1,007.65 |

**References**

1. Giral E, Yiğit V (2024) Derin Beyin Stimülasyonu Tedavisinin Maliyet Etkililiği: Sistematik Bir İnceleme. Türk Nöroşirürji Derg 34(3):105–116
2. Eggington S, Brandt A, Reimer Rasmussen E, et al (2015) Cost-Effectiveness of Deep Brain Stimulation (DBS) In Advanced Parkinson’s Disease: A Swedish Payer Perspective. Value Health 18(7):A352. <https://doi.org/10.1016/j.jval.2015.09.645>
3. Pietzsch JB, Garner AM, Marks WJ (2016) Cost-Effectiveness of Deep Brain Stimulation for Advanced Parkinson’s Disease in the United States. Neuromodulation 19(7):689–697. <https://doi.org/10.1111/ner.12474>
4. Weaver FM, Stroupe KT, Cao L, et al (2012) Parkinson’s Disease Medication Use and Costs following Deep Brain Stimulation. Mov Disord 27(11):1398–1403
5. Charles PD, Padaliya BB, Newman WJ, et al (2004) Deep Brain Stimulation of the Subthalamic Nucleus Reduces Antiparkinsonian Medication Costs. Parkinsonism Relat Disord 10(8):475–479
6. Schüpbach WMM, Chastan N, Welter ML, et al (2005) Stimulation of the Subthalamic Nucleus in Parkinson’s Disease: A 5-Year Follow-up. J Neurol Neurosurg Psychiatry 76(12):1640–1644
7. Fasano A, Romito LM, Daniele A, et al (2010) Motor and Cognitive Outcome in Patients with Parkinson’s Disease 8 Years After Subthalamic Implants. Brain 133(9):2664–2676
8. Rizzone MG, Fasano A, Daniele A, et al (2014) Long-Term Outcome of Subthalamic Nucleus DBS in Parkinson’s Disease: From the Advanced Phase Towards the Late Stage of the Disease? Park Relat Disord 20(4):376–381
